# Supplementary material for: Phosphoric acid doped polybenzimidazole as an heterogeneous catalyst for selective and efficient dehydration of saccharides to 5-hydroxymethylfurfural
Source: Royal Society of Chemistry journal article supplement (doi:10.1039/c6ra00473c), 2016-01-01
Supplement: c6ra00473c1.pdf [file c6ra00473c1.pdf]

Supporting Information

**Phosphoric Acid Doped Polybenzimidazole as an Heterogeneous Catalyst for  
Selective and Efficient Dehydration of Saccharides to 5-Hydroxymethylfurfural**

Miaomiao Han,<sup>a</sup> Xiao Liu,<sup>a, b</sup> Guangcheng Huang,<sup>a, b</sup> Yadong Liu<sup>a</sup> and  
Shengxiang Ji<sup>\*a</sup>

Fig. S1-S6

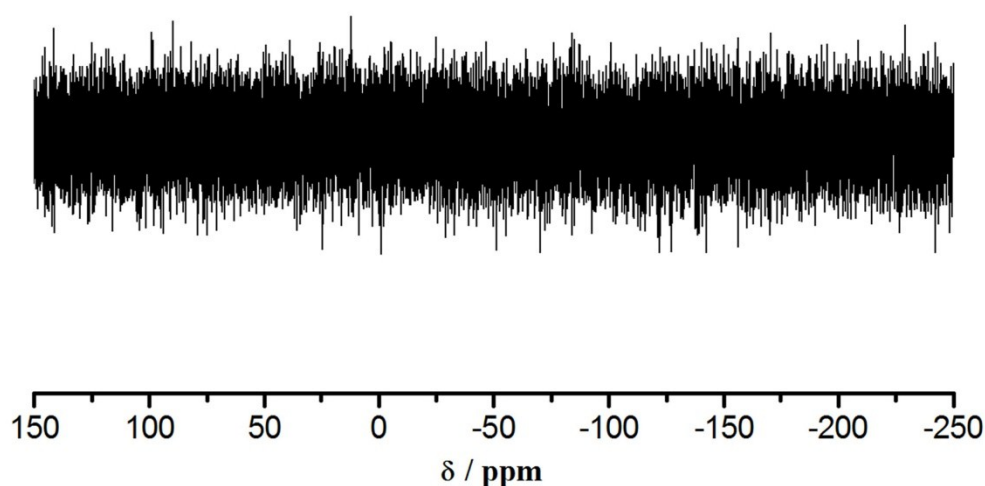

**Fig. S1.** <sup>31</sup>P NMR spectrum of the final washed water. There was no observable phosphorous signals in the <sup>31</sup>P NMR spectrum, indicating the absense of free PA in PA-PBI.

[a] Key Laboratory of Polymer Ecomaterials, Changchun Institute of Applied Chemistry, Chinese Academy of Sciences, 5625 Renmin Street, Changchun 130022, PR China  
Tel: +86 43185262286  
E-mail: [sji@ciac.ac.cn](mailto:sji@ciac.ac.cn)

[b] University of Chinese Academy of Sciences, Beijing 1000039, PR China

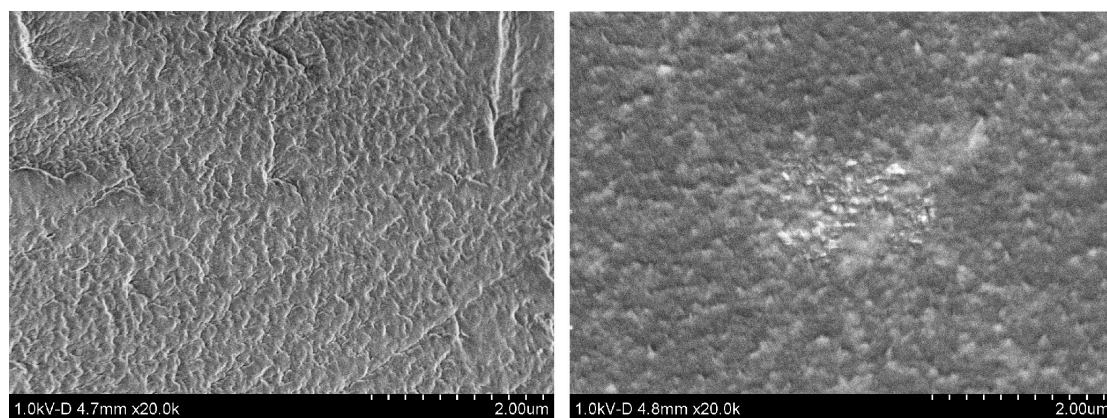

**Fig. S2.** SEM images of PA-PBI fiber (left: surface morphology of PA-PBI; right: cross section morphology of PA-PBI).

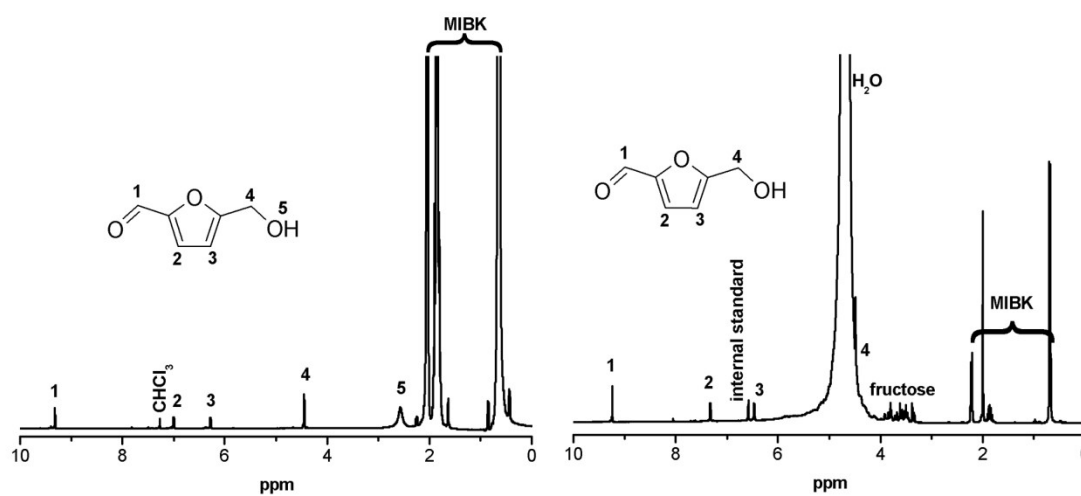

**Fig. S3.**  $^1\text{H}$  NMR spectra of reaction mixtures from fructose dehydration (left: organic phase in  $\text{CDCl}_3$ ; right: water phase in  $\text{D}_2\text{O}$ ). The organic phase only contained HMF and solvents, while the water phase contained both HMF and unreacted fructose.

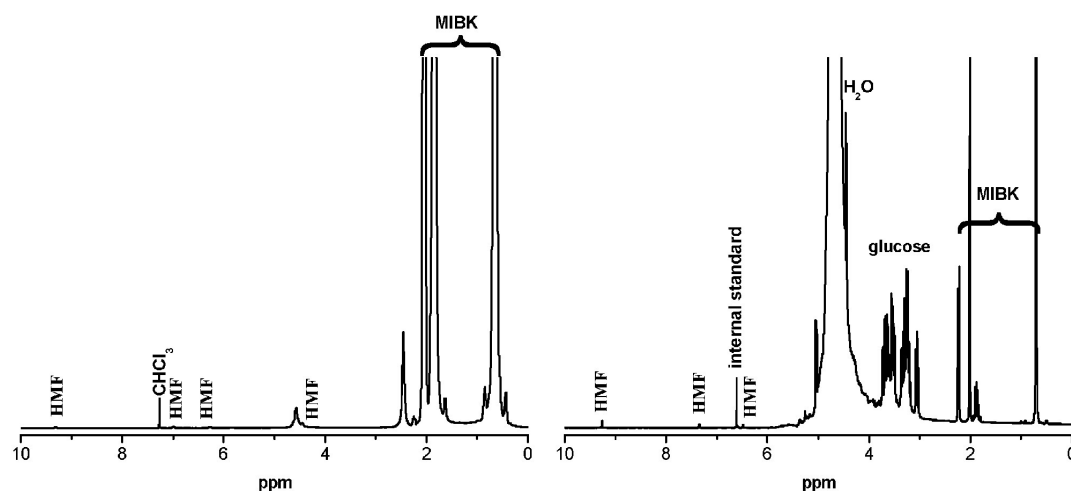

**Fig. S4.**  $^1\text{H}$  NMR spectra of reaction mixtures from glucose dehydration (left: organic phase in  $\text{CDCl}_3$ ; right: water phase in  $\text{D}_2\text{O}$ ). The organic phase only contained HMF and solvents, while the water phase contained both HMF and unreacted glucose

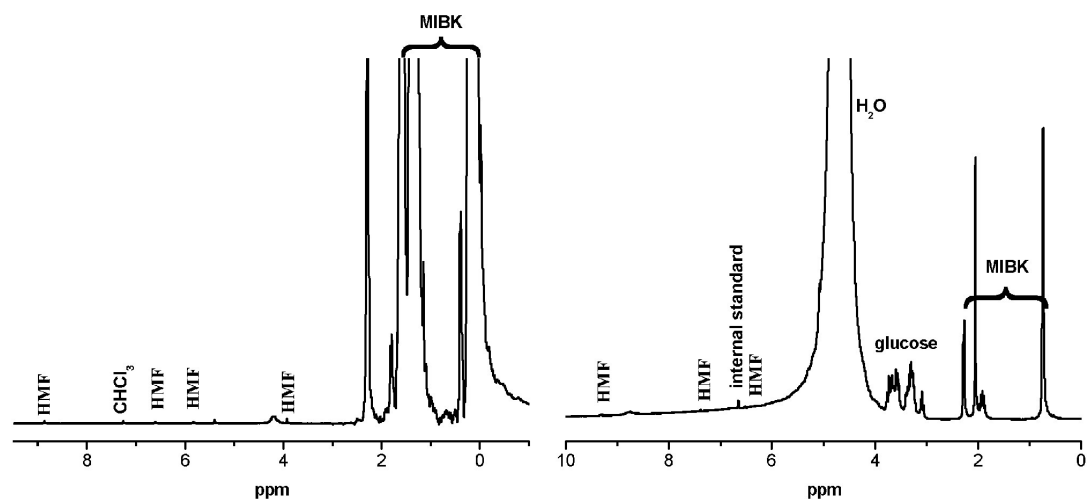

**Fig. S5.**  $^1\text{H}$  NMR spectra of reaction mixtures from the treatment of starch catalyzed by PA-PBI (left: organic phase in  $\text{CDCl}_3$ ; right: water phase in  $\text{D}_2\text{O}$ ). The water phase contained both HMF and glucose. Glucose was observed in the water phase, indicating that starch was first hydrolyzed to glucose which was then dehydrated to HMF.

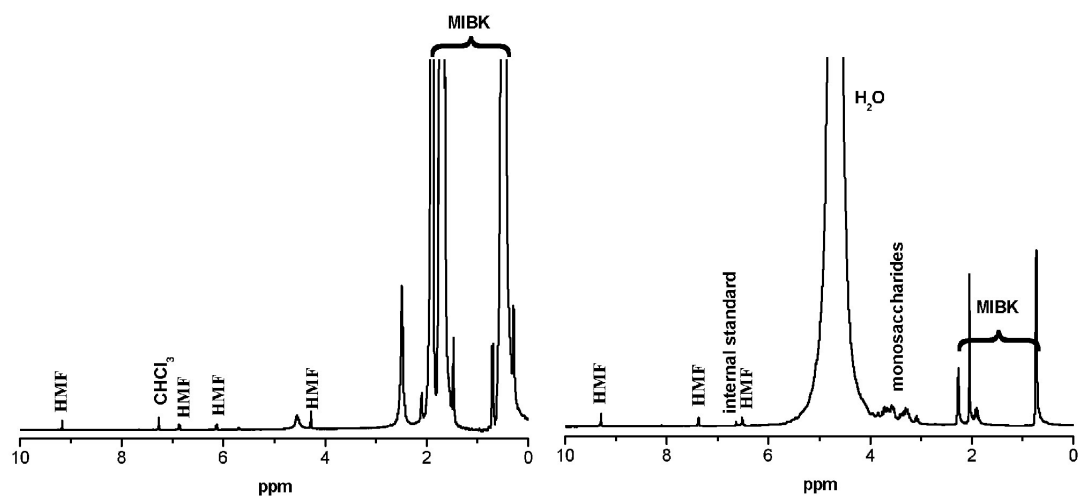

**Fig. S6.**  $^1\text{H}$  NMR spectra of reaction mixtures from the treatment of sucrose catalyzed by PA-PBI (left: organic phase in  $\text{CDCl}_3$ ; right: water phase in  $\text{D}_2\text{O}$ ). Sucrose was first hydrolyzed to glucose and fructose and the monosaccharides were then dehydrated to HMF.

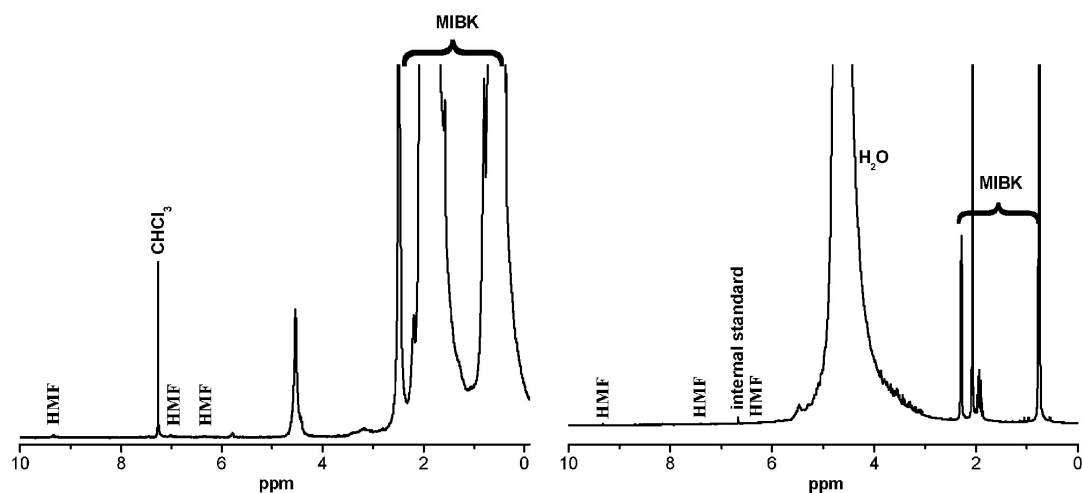

**Fig. S7.**  $^1\text{H}$  NMR spectra of reaction mixtures from the treatment of cellulose catalyzed by PA-PBI (left: organic phase in  $\text{CDCl}_3$ ; right: water phase in  $\text{D}_2\text{O}$ ). Glucose was observed in the water phase, indicating that starch was first hydrolyzed to glucose which was then dehydrated to HMF.
